# Supplementary material for: The Effect of Heavy Metals on Conjugation Efficiency of an F-Plasmid in Escherichia coli
Source: MDPI journal article supplement (doi:10.3390/antibiotics11081123), 2022-08-19
Supplement: s1 [file s1]

## Supplemental Materials

Palm, et al

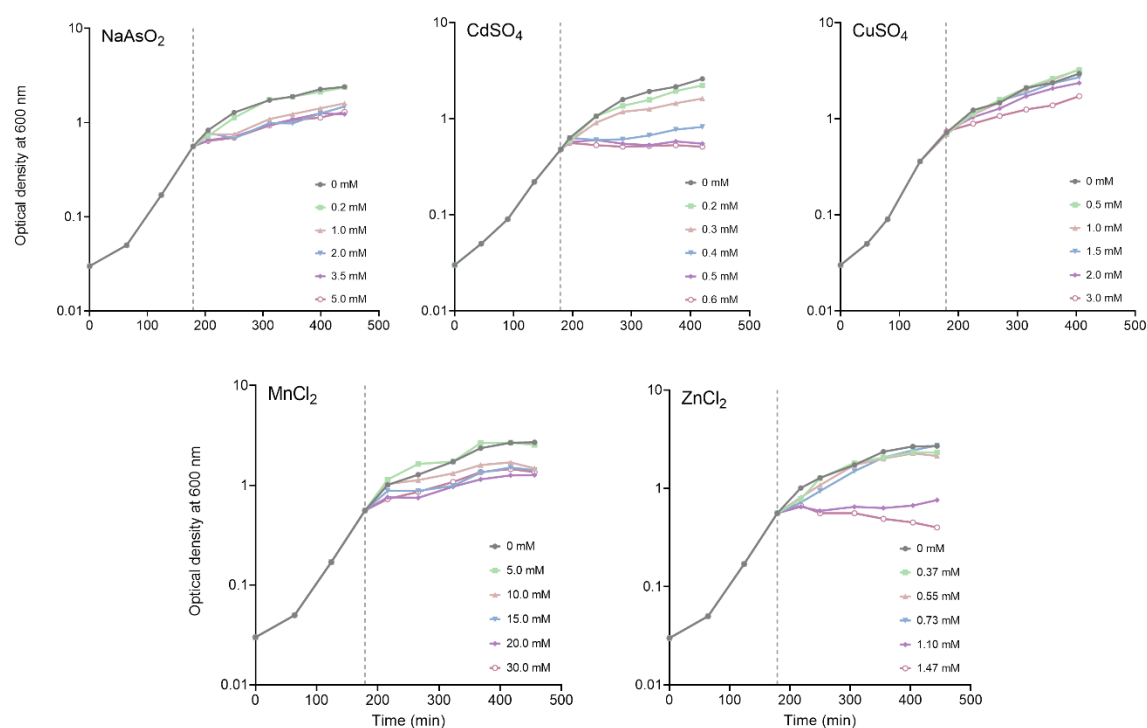

**Figure S1. Growth curves of HA14 exposed to the heavy metals.** HA14 was grown to log phase after which the culture was split into subcultures containing various concentrations of the chemicals tested. The OD<sub>600</sub> of the cultures were measured until the cells entered stationary phase. The dashed line indicates when the culture was split and the chemical added.

**Table S1. Primers used in this study**

| Primer name | Primer sequence (5' -> 3')                          |
|-------------|-----------------------------------------------------|
| lacI.FOR    | GAGCAGCATCACTGCCCCGCTTTCCAG                         |
| lacI.REV    | TTGGCCGATTCATTAATGCAGCTGGTCTGCGTCTGGCTGGCT          |
| lacZ.FOR    | CACAGACTTAGATTGGTATATATACGCATATGCGACTGTCCTGGCCGTAAC |
| lacZ.REV    | GGGAGGTGTTAATGACCATGATTACGGATTCACTGG                |
| Py.FOR      | ATCATGGTCATTAACACCTCCCGCTGTTTATCT                   |
| Py.REV      | GGGCAGTGATGCTGCTCATGTTCGTCA                         |
